# Supplementary material
Source: PubMed Central journal article supplement (PMC3776336)
Supplement: pro0022-1239-SD1.pdf [file pro0022-1239-SD1.pdf]

**A**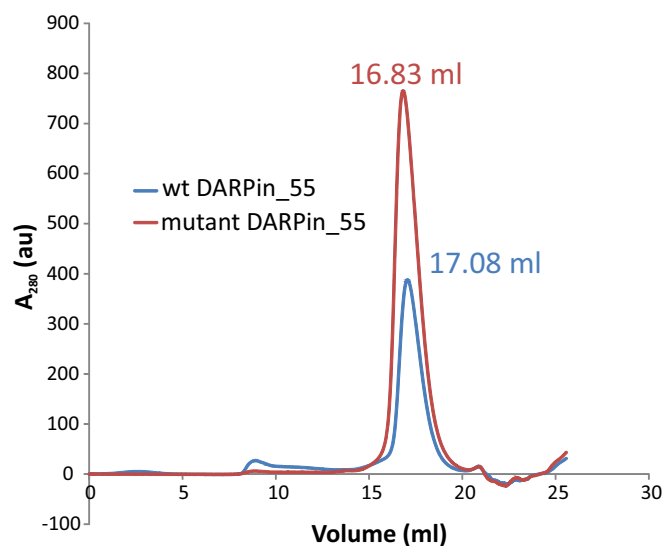**B**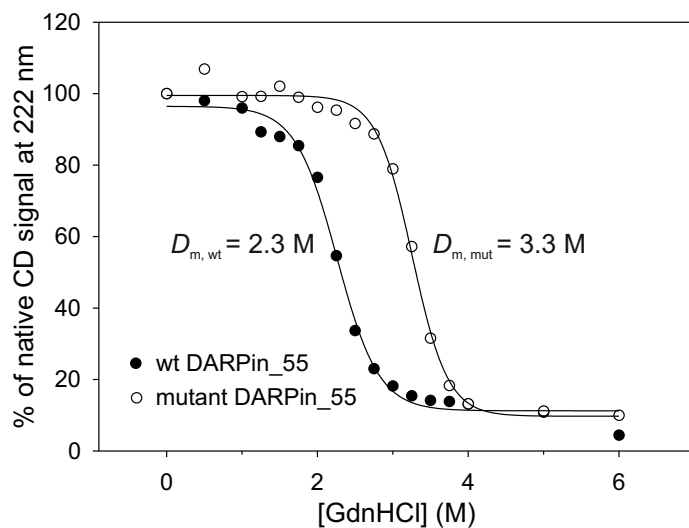

**Supporting Information Figure S1:** Biochemical analysis of surface entropy reduction mutations in DARPin\_55. Glutamate of ankyrin repeat position 21 and lysine of position 25 (Figure 1C) were mutated to aspartate and alanine, respectively, in all three internal repeats of DARPin\_55<sup>29</sup>. The resulting 6-fold mutant was compared to wild type DARPin\_55 by SEC using a Superdex 200 10/300 GL column (A) and equilibrium unfolding using GdnHCl (B).



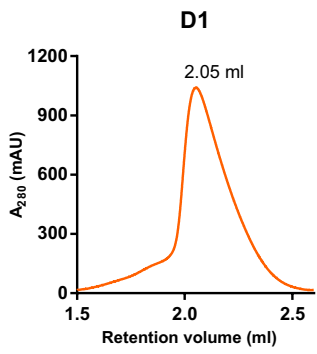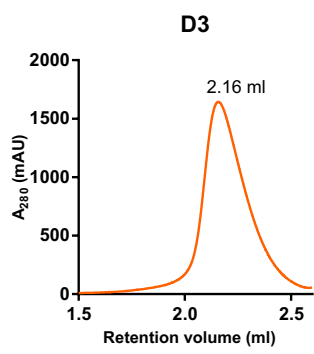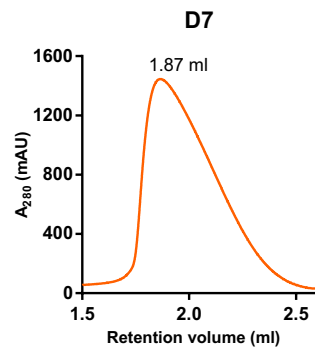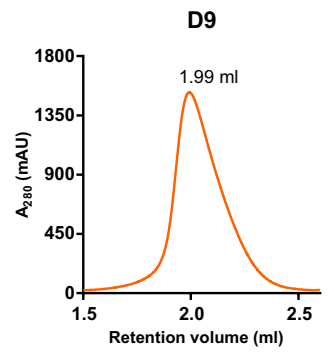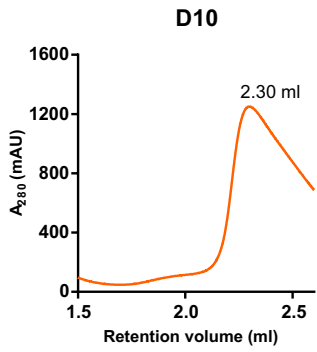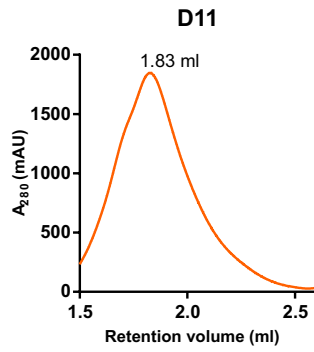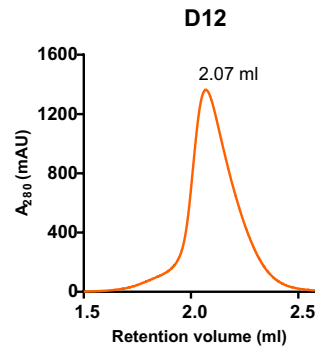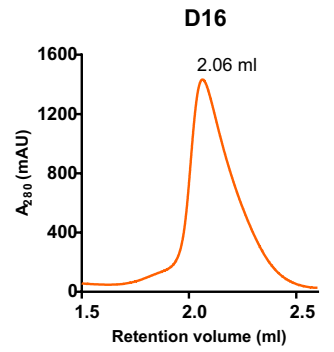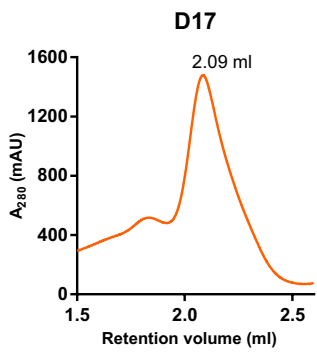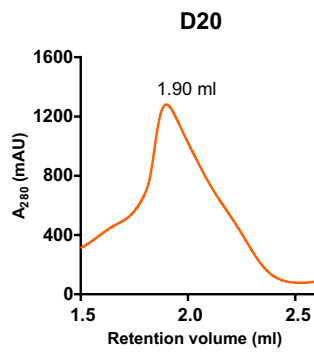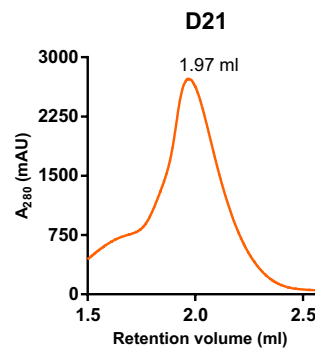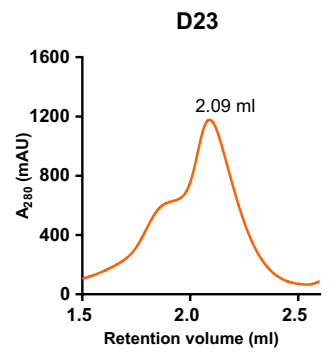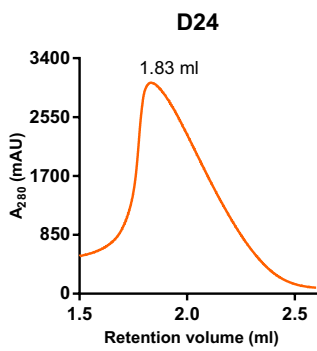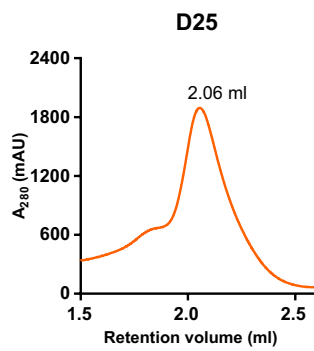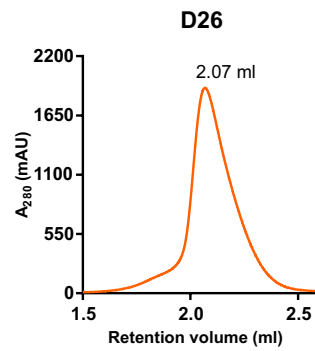



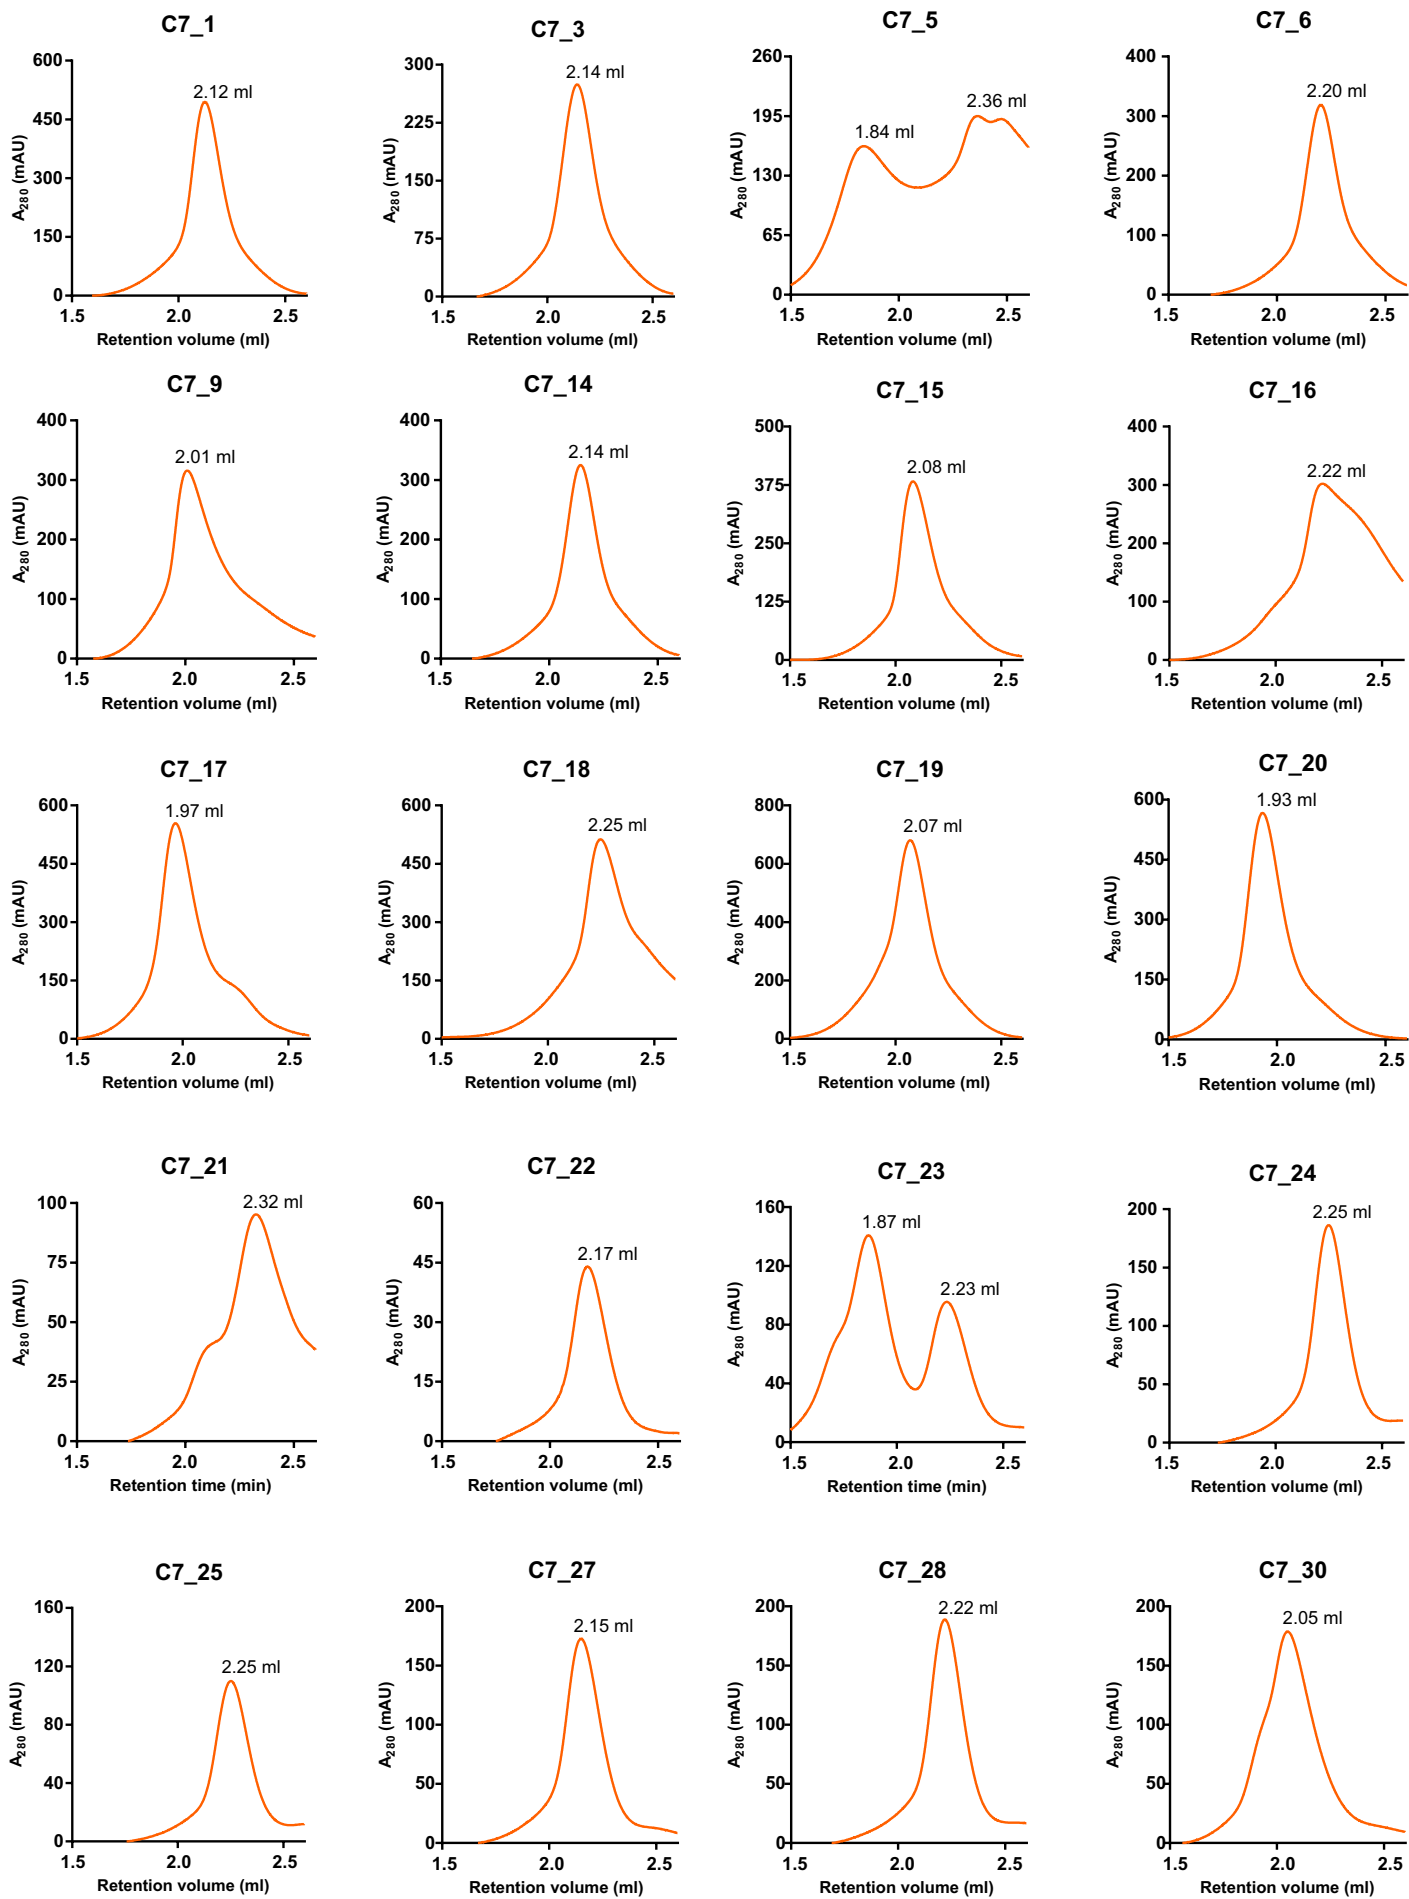

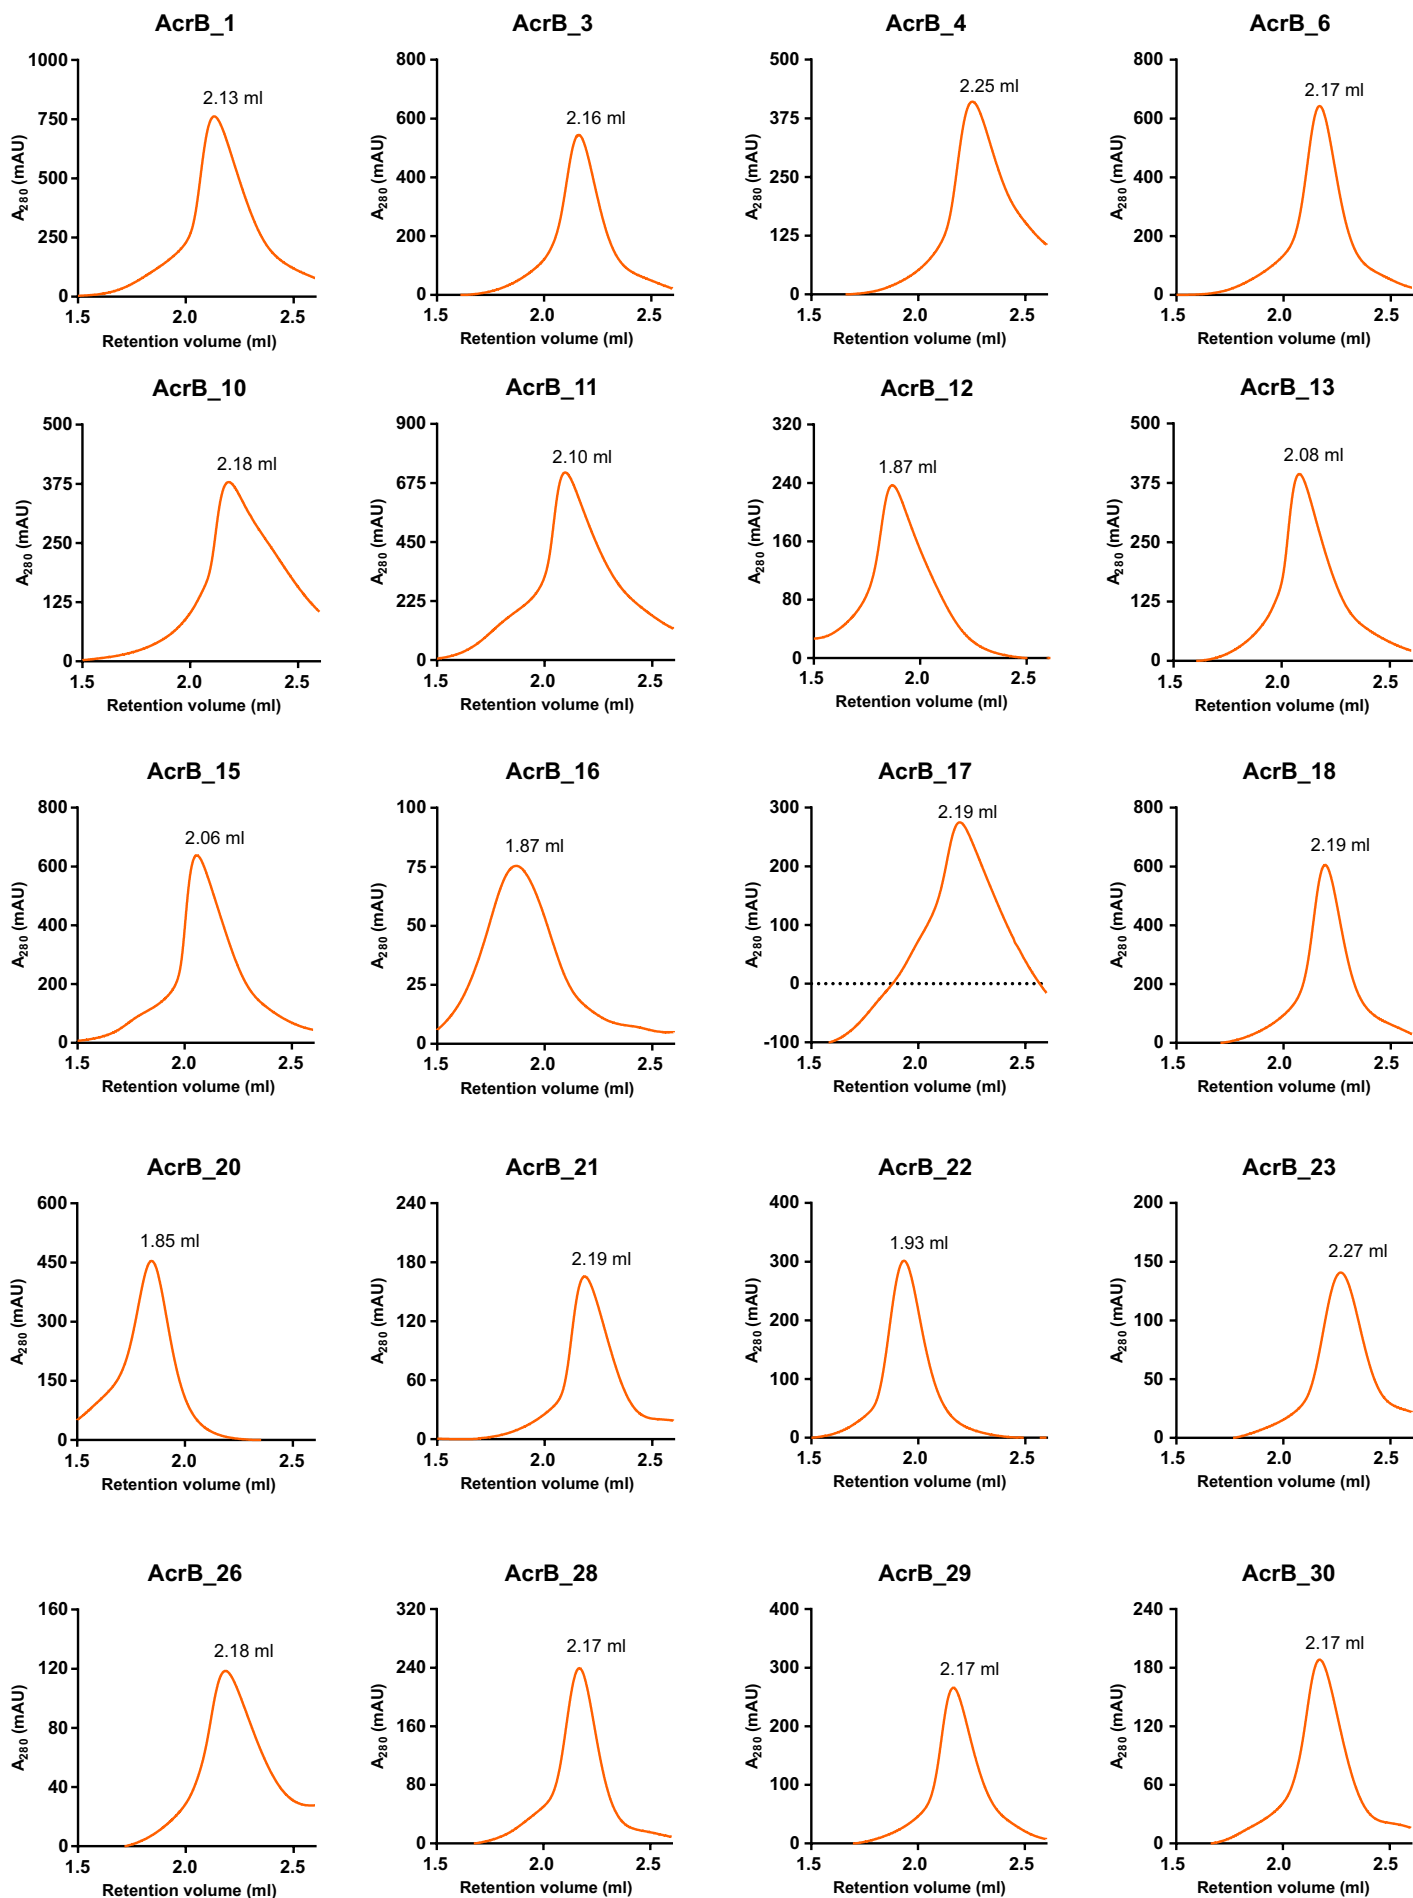

**Supporting Information Figure S3:** Analytical SEC profiles of all DARPs of the new library appearing in this study.

**A**

Caspase-3 binders, after selection round 3

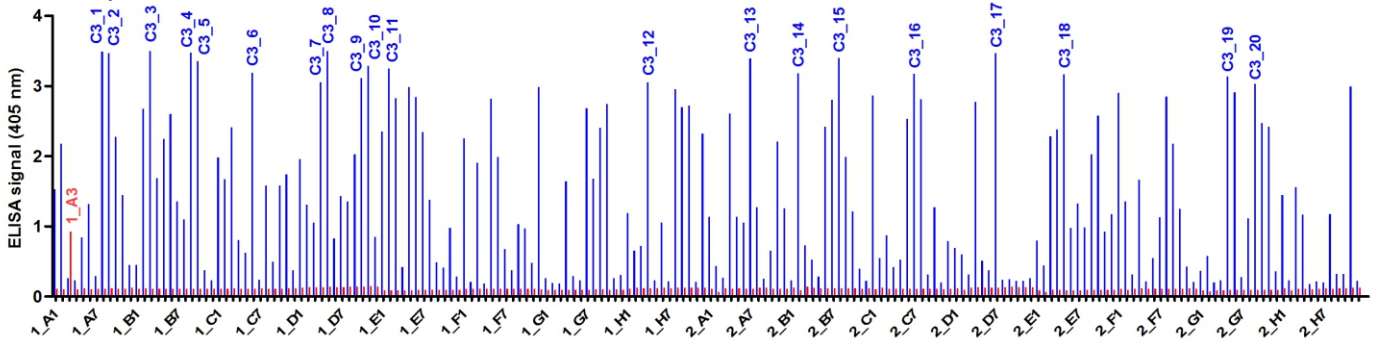

Caspase-3 binders, after selection round 4

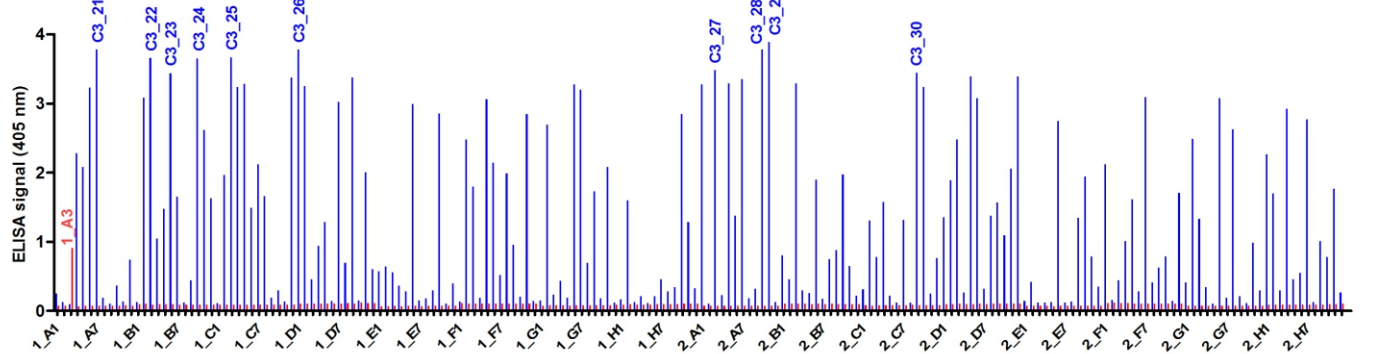**B**

Caspase-7 binders, after selection round 3

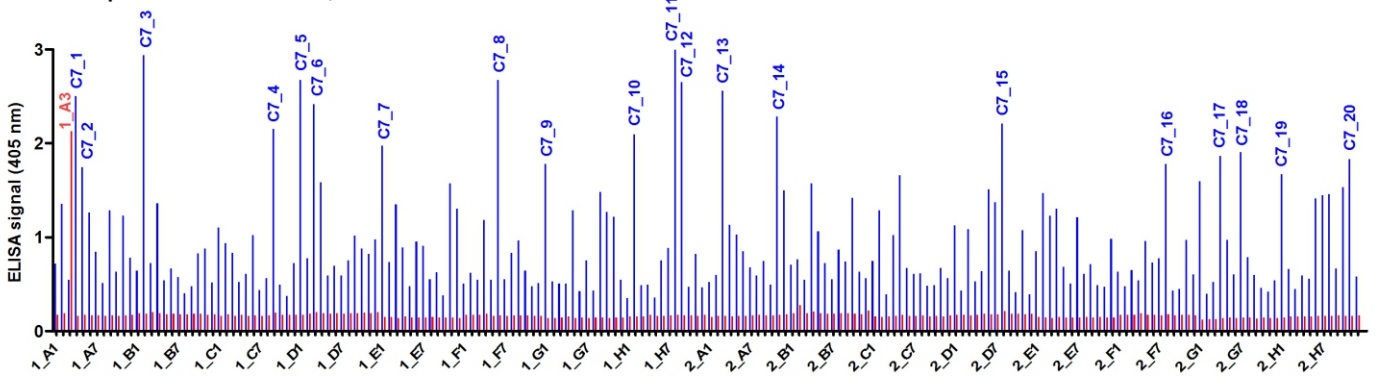

Caspase-7 binders, after selection round 4

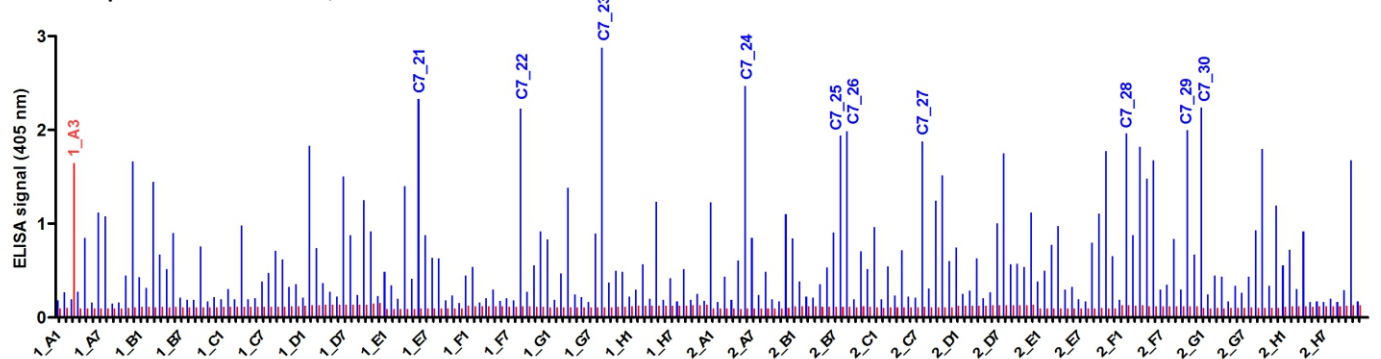

**C**

AcrB binders, after selection round 3

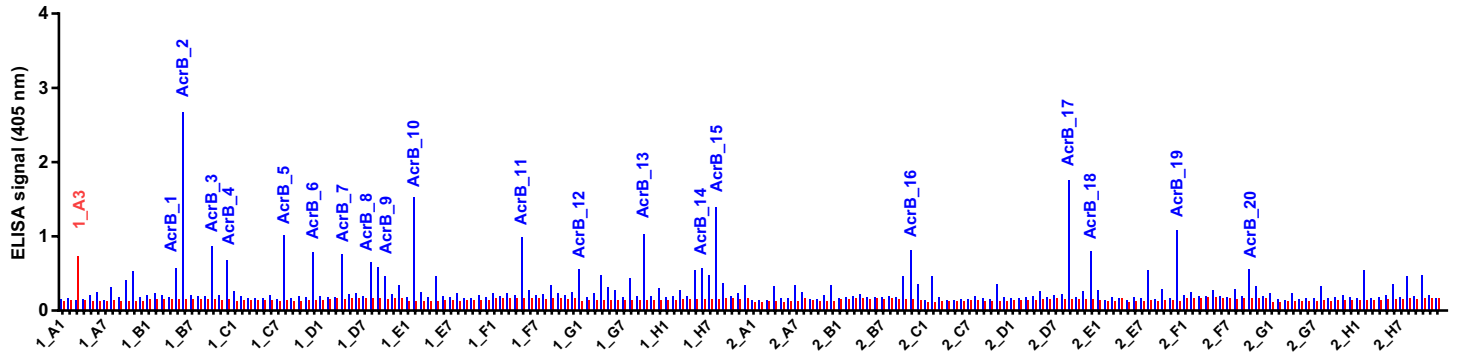

AcrB binders, after selection round 4

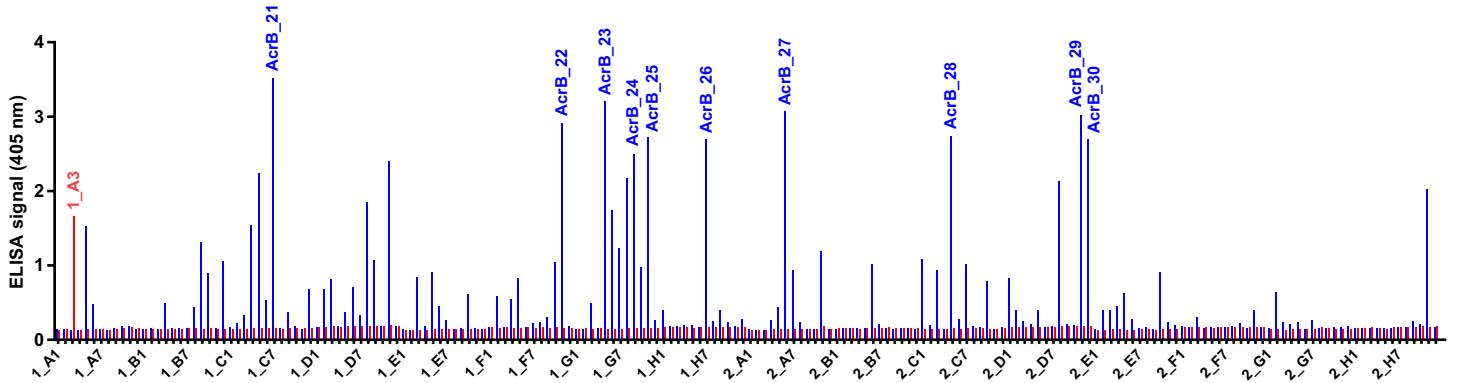

**Supporting Information Figure S4:** Crude cell extract ELISAs. DARPins selected against caspase-3 (A), caspase-7 (B) and AcrB (C) were probed for binding against the respective target and the control protein MBP.



|       |                                           | 10  | 20 | 30 | 40 | 50 | 60 | 70 |   |   |   |   |   |   |   |   |   |   |   |   |   |   |   |   |   |   |   |   |   |   |   |
|-------|-------------------------------------------|-----|----|----|----|----|----|----|---|---|---|---|---|---|---|---|---|---|---|---|---|---|---|---|---|---|---|---|---|---|---|
| N3C   | MRGSHHHHHGSDLGKKLLDAASAGQDDEVRLMANGADVNAS | X   | X  | X  | G  | X  | T  | P  | L | H | X | X | X | G | H | L | E | I | V | D | V | L | L | A | Z | G | A | D | V | N | A |
| C3_1  |                                           | DRQ | A  | A  | A  | A  | A  | T  | S | I | I | Y | E | H | H | H | H | H | H | H | H | H | H | H | H | H | H | H | H | H | H |
| C3_2  |                                           | DNW | A  | A  | A  | A  | A  | S  | S | S | S | Y | Y | H | H | H | H | H | H | H | H | H | H | H | H | H | H | H | H | H | D |
| C3_3  |                                           | DND | A  | A  | A  | A  | A  | S  | S | S | S | Y | Y | Y | V | V | V | V | V | V | V | V | V | V | V | V | V | V | V | V | V |
| C3_4  |                                           | DHA | A  | A  | A  | A  | A  | S  | S | S | S | Y | Y | Y | Y | Y | Y | Y | Y | Y | Y | Y | Y | Y | Y | Y | Y | Y | Y | Y | Y |
| C3_5  |                                           | DWH | A  | A  | A  | A  | A  | S  | S | S | S | Y | Y | Y | Y | Y | Y | Y | Y | Y | Y | Y | Y | Y | Y | Y | Y | Y | Y | Y | Y |
| C3_7  |                                           | TQT | A  | A  | A  | A  | A  | S  | S | S | S | Y | Y | Y | Y | Y | Y | Y | Y | Y | Y | Y | Y | Y | Y | Y | Y | Y | Y | Y | Y |
| C3_8  |                                           | TEH | A  | A  | A  | A  | A  | S  | S | S | S | Y | Y | Y | Y | Y | Y | Y | Y | Y | Y | Y | Y | Y | Y | Y | Y | Y | Y | Y | Y |
| C3_9  |                                           | NWH | A  | A  | A  | A  | A  | S  | S | S | S | Y | Y | Y | Y | Y | Y | Y | Y | Y | Y | Y | Y | Y | Y | Y | Y | Y | Y | Y | Y |
| C3_10 |                                           | DWN | A  | A  | A  | A  | A  | S  | S | S | S | Y | Y | Y | Y | Y | Y | Y | Y | Y | Y | Y | Y | Y | Y | Y | Y | Y | Y | Y | Y |
| C3_11 |                                           | SYA | A  | A  | A  | A  | A  | S  | S | S | S | Y | Y | Y | Y | Y | Y | Y | Y | Y | Y | Y | Y | Y | Y | Y | Y | Y | Y | Y | Y |
| C3_12 |                                           | TTN | A  | A  | A  | A  | A  | S  | S | S | S | Y | Y | Y | Y | Y | Y | Y | Y | Y | Y | Y | Y | Y | Y | Y | Y | Y | Y | Y | Y |
| C3_13 |                                           | DTN | A  | A  | A  | A  | A  | S  | S | S | S | Y | Y | Y | Y | Y | Y | Y | Y | Y | Y | Y | Y | Y | Y | Y | Y | Y | Y | Y | Y |
| C3_15 |                                           | TAT | A  | A  | A  | A  | A  | S  | S | S | S | Y | Y | Y | Y | Y | Y | Y | Y | Y | Y | Y | Y | Y | Y | Y | Y | Y | Y | Y | Y |
| C3_16 |                                           | NQY | A  | A  | A  | A  | A  | S  | S | S | S | Y | Y | Y | Y | Y | Y | Y | Y | Y | Y | Y | Y | Y | Y | Y | Y | Y | Y | Y | Y |
| C3_17 |                                           | DHN | A  | A  | A  | A  | A  | S  | S | S | S | Y | Y | Y | Y | Y | Y | Y | Y | Y | Y | Y | Y | Y | Y | Y | Y | Y | Y | Y | Y |
| C3_18 |                                           | DSY | A  | A  | A  | A  | A  | S  | S | S | S | Y | Y | Y | Y | Y | Y | Y | Y | Y | Y | Y | Y | Y | Y | Y | Y | Y | Y | Y | Y |
| C3_19 |                                           | SAY | A  | A  | A  | A  | A  | S  | S | S | S | Y | Y | Y | Y | Y | Y | Y | Y | Y | Y | Y | Y | Y | Y | Y | Y | Y | Y | Y | Y |
| C3_20 |                                           | TDS | A  | A  | A  | A  | A  | S  | S | S | S | Y | Y | Y | Y | Y | Y | Y | Y | Y | Y | Y | Y | Y | Y | Y | Y | Y | Y | Y | Y |
| C3_21 |                                           | TDE | A  | A  | A  | A  | A  | S  | S | S | S | Y | Y | Y | Y | Y | Y | Y | Y | Y | Y | Y | Y | Y | Y | Y | Y | Y | Y | Y | Y |
| C3_22 |                                           | DYY | A  | A  | A  | A  | A  | S  | S | S | S | Y | Y | Y | Y | Y | Y | Y | Y | Y | Y | Y | Y | Y | Y | Y | Y | Y | Y | Y | Y |
| C3_23 |                                           | SEY | A  | A  | A  | A  | A  | S  | S | S | S | Y | Y | Y | Y | Y | Y | Y | Y | Y | Y | Y | Y | Y | Y | Y | Y | Y | Y | Y | Y |
| C3_24 |                                           | DKH | A  | A  | A  | A  | A  | S  | S | S | S | Y | Y | Y | Y | Y | Y | Y | Y | Y | Y | Y | Y | Y | Y | Y | Y | Y | Y | Y | Y |
| C3_25 |                                           | SDY | A  | A  | A  | A  | A  | S  | S | S | S | Y | Y | Y | Y | Y | Y | Y | Y | Y | Y | Y | Y | Y | Y | Y | Y | Y | Y | Y | Y |
| C3_26 |                                           | TNA | A  | A  | A  | A  | A  | S  | S | S | S | Y | Y | Y | Y | Y | Y | Y | Y | Y | Y | Y | Y | Y | Y | Y | Y | Y | Y | Y | Y |
| C3_27 |                                           | DNS | A  | A  | A  | A  | A  | S  | S | S | S | Y | Y | Y | Y | Y | Y | Y | Y | Y | Y | Y | Y | Y | Y | Y | Y | Y | Y | Y | Y |
| C3_28 |                                           | DKY | A  | A  | A  | A  | A  | S  | S | S | S | Y | Y | Y | Y | Y | Y | Y | Y | Y | Y | Y | Y | Y | Y | Y | Y | Y | Y | Y | Y |
| C3_29 |                                           | DMN | A  | A  | A  | A  | A  | S  | S | S | S | Y | Y | Y | Y | Y | Y | Y | Y | Y | Y | Y | Y | Y | Y | Y | Y | Y | Y | Y | Y |
| C3_30 |                                           | SNW | A  | A  | A  | A  | A  | S  | S | S | S | Y | Y | Y | Y | Y | Y | Y | Y | Y | Y | Y | Y | Y | Y | Y | Y | Y | Y | Y | Y |

N-Cap
Repeat 1

|       |   | 80  | 90 | 100 | 110 | 120 | 130 | 140 | 150 |   |   |   |   |   |   |   |   |   |   |   |   |   |   |   |   |   |   |   |   |   |   |   |   |   |   |   |   |   |   |   |   |
|-------|---|-----|----|-----|-----|-----|-----|-----|-----|---|---|---|---|---|---|---|---|---|---|---|---|---|---|---|---|---|---|---|---|---|---|---|---|---|---|---|---|---|---|---|---|
| N3C   | S | X   | X  | X   | G   | X   | T   | P   | L   | H | X | X | X | G | H | L | E | I | V | D | V | L | L | A | Z | G | A | D | V | N | A | N | X | X | X | G | K | T | P | F |   |
| C3_1  |   | TYY | E  | A   | R   | N   | N   | T   | Q   | W | A | S | T | S | N | N | N | N | N | N | N | N | N | N | N | N | N | N | N | N | N | N | N | N | N | N | N | N | N | N |   |
| C3_2  |   | TNY | E  | A   | Y   | N   | N   | T   | T   | A | S | T | Q | S | H | H | H | H | H | H | H | H | H | H | H | H | H | H | H | H | H | H | H | H | H | H | H | H | H | H |   |
| C3_3  |   | TDY | E  | L   | Y   | H   | H   | T   | N   | W | Y | V | K | N | H | H | H | H | H | H | H | H | H | H | H | H | H | H | H | H | H | H | H | H | H | H | H | H | H | H |   |
| C3_4  |   | TDY | E  | L   | Y   | H   | H   | T   | S   | W | H | A | R | H | Y | Y | Y | Y | Y | Y | Y | Y | Y | Y | Y | Y | Y | Y | Y | Y | Y | Y | Y | Y | Y | Y | Y | Y | Y | Y | Y |
| C3_5  |   | TEY | E  | A   | A   | N   | N   | T   | T   | H | Y | S | S | R | N | N | N | N | N | N | N | N | N | N | N | N | N | N | N | N | N | N | N | N | N | N | N | N | N | N |   |
| C3_7  |   | TAY | E  | A   | Q   | N   | N   | T   | N   | W | Y | V | K | T | H | H | H | H | H | H | H | H | H | H | H | H | H | H | H | H | H | H | H | H | H | H | H | H | H | H |   |
| C3_8  |   | TDY | E  | V   | Y   | T   | T   | N   | Y   | T | W | A | H | H | H | H | H | H | H | H | H | H | H | H | H | H | H | H | H | H | H | H | H | H | H | H | H | H | H | H |   |
| C3_9  |   | TYY | E  | A   | E   | T   | H   | T   | T   | E | W | S | V | A | R | H | H | H | H | H | H | H | H | H | H | H | H | H | H | H | H | H | H | H | H | H | H | H | H | H |   |
| C3_10 |   | TQY | E  | A   | Q   | A   | I   | N   | N   | T | V | Y | T | S | N | N | N | N | N | N | N | N | N | N | N | N | N | N | N | N | N | N | N | N | N | N | N | N | N | N |   |
| C3_11 |   | TYY | E  | V   | Y   | S   | N   | N   | N   | T | Q | H | N | V | R | H | H | H | H | H | H | H | H | H | H | H | H | H | H | H | H | H | H | H | H | H | H | H | H | H |   |
| C3_12 |   | TAY | E  | V   | R   | Y   | N   | N   | N   | T | Q | W | N | S | S | Y | N | N | N | N | N | N | N | N | N | N | N | N | N | N | N | N | N | N | N | N | N | N | N | N |   |
| C3_13 |   | TYY | E  | A   | Y   | A   | N   | N   | N   | S | H | W | D | A | K | R | N | N | N | N | N | N | N | N | N | N | N | N | N | N | N | N | N | N | N | N | N | N | N | N |   |
| C3_15 |   | TYY | E  | A   | Y   | T   | N   | N   | N   | T | N | W | Y | V | A | Y | H | H | H | H | H | H | H | H | H | H | H | H | H | H | H | H | H | H | H | H | H | H | H | H |   |
| C3_16 |   | TWH | E  | V   | Y   | R   | N   | N   | N   | T | D | W | Y | V | A | N | H | H | H | H | H | H | H | H | H | H | H | H | H | H | H | H | H | H | H | H | H | H | H | H |   |
| C3_17 |   | TWY | E  | V   | Y   | S   | N   | N   | N   | T | A | W | T | V | S | E | H | H | H | H | H | H | H | H | H | H | H | H | H | H | H | H | H | H | H | H | H | H | H | H |   |
| C3_18 |   | TNY | E  | V   | Y   | K   | N   | N   | N   | T | T | W | Y | V | H | H | N | N | N | N | N | N | N | N | N | N | N | N | N | N | N | N | N | N | N | N | N | N | N | N |   |
| C3_19 |   | TAY | E  | V   | T   | R   | H   | N   | N   | T | A | W | S | S | R | D | H | H | H | H | H | H | H | H | H | H | H | H | H | H | H | H | H | H | H | H | H | H | H | H |   |
| C3_20 |   | TYY | E  | V   | Y   | R   | Y   | N   | N   | T | N | W | N | T | R | Y | N | Y | Y | Y | Y | Y | Y | Y | Y | Y | Y | Y | Y | Y | Y | Y | Y | Y | Y | Y | Y | Y | Y | Y | Y |
| C3_21 |   | TNY | E  | V   | N   | A   | N   | N   | N   | T | A | Y | R | A | R | W | F | Y | Y | Y | Y | Y | Y | Y | Y | Y | Y | Y | Y | Y | Y | Y | Y | Y | Y | Y | Y | Y | Y | Y |   |
| C3_22 |   | THY | E  | L   | T   | N   | N   | N   | N   | T | N | N | W | Y | A | R | H | H | H | H | H | H | H | H | H | H | H | H | H | H | H | H | H | H | H | H | H | H | H | H |   |
| C3_23 |   | TAY | E  | T   | N   | N   | N   | N   | N   | S | N | W | A | S | A | W | N | N | N | N | N | N | N | N | N | N | N | N | N | N | N | N | N | N | N | N | N | N | N | N | N |
| C3_24 |   | TAY | E  | A   | N   | S   | Y   | N   | N   | T | N | N | W | Q | S | Y | H | H | H | H | H | H | H | H | H | H | H | H | H | H | H | H | H | H | H | H | H | H | H | H |   |
| C3_25 |   | TAY | E  | V   | Y   | S   | Y   | N   | N   | T | S | Q | W | A | S | A | R | H | H | H | H | H | H | H | H | H | H | H | H | H | H | H | H | H | H | H | H | H | H | H |   |
| C3_26 |   | TDY | E  | V   | Y   | A   | Y   | N   | N   | T | Q | W | N | V | A | Y | H | H | H | H | H | H | H | H | H | H | H | H | H | H | H | H | H | H | H | H | H | H | H | H |   |
| C3_27 |   | NHY | E  | A   | S   | K   | N   | N   | N   | T | S | N | W | A | V | R | H | H | H | H | H | H | H | H | H | H | H | H | H | H | H | H | H | H | H | H | H | H | H | H |   |
| C3_28 |   | TDY | E  | A   | T   | S   | A   | N   | N   | T | A | W | R | V | Y | A | V | H | H | H | H | H | H | H | H | H | H | H | H | H | H | H | H | H | H | H | H | H | H | H |   |
| C3_29 |   | TDY | E  | V   | Y   | T   | N   | N   | N   | T | H | W | T | A | T | Y | H | H | H | H | H | H | H | H | H | H | H | H | H | H | H | H | H | H | H | H | H | H | H | H |   |
| C3_30 |   | TDY | E  | V   | Q   | E   | H   | N   | N   | T | A | W | N | V | K | Y | T | Y | Y |   |   |   |   |   |   |   |   |   |   |   |   |   |   |   |   |   |   |   |   |   |   |

|       | 160                             | 170     | 180 |     |
|-------|---------------------------------|---------|-----|-----|
| N3C   | DLAIDNGNEDIAEVLQKAAKLGSGSMEQKLI | SEEDLNE |     | 188 |
| C3_1  | .....                           |         |     | 187 |
| C3_2  | .....                           |         |     | 188 |
| C3_3  | .....                           | .N..... |     | 188 |
| C3_4  | .....                           |         |     | 188 |
| C3_5  | .....                           |         |     | 188 |
| C3_7  | .....                           |         |     | 188 |
| C3_8  | .....                           |         |     | 188 |
| C3_9  | .....                           |         |     | 188 |
| C3_10 | .....                           |         |     | 188 |
| C3_11 | .....                           |         |     | 188 |
| C3_12 | .....                           | .V..... |     | 188 |
| C3_13 | .....                           |         |     | 188 |
| C3_15 | N.....                          |         |     | 188 |
| C3_16 | .....                           |         |     | 188 |
| C3_17 | .....                           |         |     | 188 |
| C3_18 | .....                           |         |     | 188 |
| C3_19 | .....                           |         |     | 188 |
| C3_20 | .....                           |         |     | 188 |
| C3_21 | .....                           |         |     | 188 |
| C3_22 | .....                           |         |     | 188 |
| C3_23 | .....                           |         |     | 188 |
| C3_24 | .....                           | .G..... |     | 188 |
| C3_25 | .....                           | .T..... |     | 188 |
| C3_26 | .....                           |         |     | 188 |
| C3_27 | .....                           |         |     | 188 |
| C3_28 | .....                           |         |     | 188 |
| C3_29 | .....                           |         |     | 188 |
| C3_30 | .....                           |         |     | 188 |

  
*C-Cap*

**Supporting Information Figure S5:** Sequence alignment of caspase-3 specific DARPins. A TXYGE motif in the  $\beta$ -turn of the second internal repeat suggests a single binding epitope on caspase-3 for all these binders.

|       |                                           | 10 | 20 | 30 | 40 | 50 | 60 | 70 |   |   |   |   |   |   |   |   |   |   |   |   |   |   |   |   |   |   |   |   |   |   |   |   |   |   |   |   |   |   |   |   |
|-------|-------------------------------------------|----|----|----|----|----|----|----|---|---|---|---|---|---|---|---|---|---|---|---|---|---|---|---|---|---|---|---|---|---|---|---|---|---|---|---|---|---|---|---|
| N3C   | MRGSHHHHHGSDLGKKLLDAASAGQDDEVRLMANGADVNAS | X  | X  | X  | G  | X  | T  | P  | L | H | X | A | X | X | G | H | L | E | I | V | D | V | L | L | A | Z | G | A | D | V | N | A |   |   |   |   |   |   |   |   |
| C7_1  |                                           | D  | Y  | A  | W  | W  | T  | I  | S | W | N | H | N | H | N | H | N | H | N | H | N | H | N | H | N | H | N | H | N | H | N | H | N |   |   |   |   |   |   |   |
| C7_3  |                                           | D  | A  | Y  | W  | W  | T  | I  | S | W | N | H | N | H | N | H | N | H | N | H | N | H | N | H | N | H | N | H | N | H | N | H | N |   |   |   |   |   |   |   |
| C7_5  |                                           | N  | R  | R  | Y  | Y  | V  | V  | S | A | H | N | H | N | H | N | H | N | H | N | H | N | H | N | H | N | H | N | H | N | H | N | H | N |   |   |   |   |   |   |
| C7_6  |                                           | D  | A  | W  | R  | R  | S  | S  | T | W | N | H | N | H | N | H | N | H | N | H | N | H | N | H | N | H | N | H | N | H | N | H | N | H | N |   |   |   |   |   |
| C7_7  |                                           | D  | W  | T  | H  | R  | S  | S  | R | N | H | N | H | N | H | N | H | N | H | N | H | N | H | N | H | N | H | N | H | N | H | N | H | N | H | N |   |   |   |   |
| C7_9  |                                           | D  | Y  | A  | Q  | Q  | L  | L  | H | Y | N | H | N | H | N | H | N | H | N | H | N | H | N | H | N | H | N | H | N | H | N | H | N | H | N | H | N |   |   |   |
| C7_14 |                                           | D  | S  | W  | R  | R  | A  | A  | H | Y | N | H | N | H | N | H | N | H | N | H | N | H | N | H | N | H | N | H | N | H | N | H | N | H | N | H | N |   |   |   |
| C7_15 |                                           | S  | W  | E  | H  | L  | L  | A  | Y | N | H | N | H | N | H | N | H | N | H | N | H | N | H | N | H | N | H | N | H | N | H | N | H | N | H | N | H | N |   |   |
| C7_16 |                                           | N  | Q  | Q  | W  | W  | A  | T  | E | Y | N | H | N | H | N | H | N | H | N | H | N | H | N | H | N | H | N | H | N | H | N | H | N | H | N | H | N | H | N |   |
| C7_17 |                                           | D  | W  | Y  | W  | W  | T  | I  | N | H | N | H | N | H | N | H | N | H | N | H | N | H | N | H | N | H | N | H | N | H | N | H | N | H | N | H | N | H | N |   |
| C7_19 |                                           | D  | N  | S  | W  | W  | V  | V  | A | W | N | H | N | H | N | H | N | H | N | H | N | H | N | H | N | H | N | H | N | H | N | H | N | H | N | H | N | H | N |   |
| C7_20 |                                           | D  | S  | W  | R  | R  | V  | V  | Y | H | N | H | N | H | N | H | N | H | N | H | N | H | N | H | N | H | N | H | N | H | N | H | N | H | N | H | N | H | N |   |
| C7_21 |                                           | D  | T  | Y  | E  | E  | V  | V  | W | R | N | H | N | H | N | H | N | H | N | H | N | H | N | H | N | H | N | H | N | H | N | H | N | H | N | H | N | H | N |   |
| C7_22 |                                           | N  | W  | E  | Y  | Y  | L  | L  | W | W | N | H | N | H | N | H | N | H | N | H | N | H | N | H | N | H | N | H | N | H | N | H | N | H | N | H | N | H | N |   |
| C7_23 |                                           | S  | W  | E  | Y  | Y  | L  | L  | Y | A | N | H | N | H | N | H | N | H | N | H | N | H | N | H | N | H | N | H | N | H | N | H | N | H | N | H | N | H | N |   |
| C7_24 |                                           | D  | A  | W  | Q  | Q  | L  | L  | Q | W | Y | N | H | N | H | N | H | N | H | N | H | N | H | N | H | N | H | N | H | N | H | N | H | N | H | N | H | N | H | N |
| C7_25 |                                           | D  | S  | W  | I  | I  | A  | A  | Y | A | N | H | N | H | N | H | N | H | N | H | N | H | N | H | N | H | N | H | N | H | N | H | N | H | N | H | N | H | N |   |
| C7_26 |                                           | N  | S  | W  | W  | W  | L  | L  | W | K | N | H | N | H | N | H | N | H | N | H | N | H | N | H | N | H | N | H | N | H | N | H | N | H | N | H | N | H | N |   |
| C7_27 |                                           | D  | S  | W  | S  | S  | S  | S  | S | N | N | H | N | H | N | H | N | H | N | H | N | H | N | H | N | H | N | H | N | H | N | H | N | H | N | H | N | H | N |   |
| C7_28 |                                           | D  | A  | W  | Q  | Q  | L  | L  | Q | W | Y | N | H | N | H | N | H | N | H | N | H | N | H | N | H | N | H | N | H | N | H | N | H | N | H | N | H | N | H | N |
| C7_29 |                                           | N  | W  | E  | Y  | Y  | V  | V  | Y | Y | N | H | N | H | N | H | N | H | N | H | N | H | N | H | N | H | N | H | N | H | N | H | N | H | N | H | N | H | N |   |
| C7_30 |                                           | S  | D  | N  | E  | E  | A  | A  | H | H | N | H | N | H | N | H | N | H | N | H | N | H | N | H | N | H | N | H | N | H | N | H | N | H | N | H | N | H | N |   |

|       |   | 80 | 90 | 100 | 110 | 120 | 130 | 140 | 150 |   |   |   |   |   |   |   |   |   |   |   |   |   |   |   |   |   |   |   |   |   |   |   |   |   |   |   |   |   |   |   |   |   |   |   |   |
|-------|---|----|----|-----|-----|-----|-----|-----|-----|---|---|---|---|---|---|---|---|---|---|---|---|---|---|---|---|---|---|---|---|---|---|---|---|---|---|---|---|---|---|---|---|---|---|---|---|
| N3C   | S | X  | X  | X   | G   | X   | T   | P   | L   | H | X | A | X | X | G | H | L | E | I | V | D | V | L | L | A | Z | G | A | D | V | N | A | N | X | X | X | G | K | T | P | F |   |   |   |   |
| C7_1  | D | H  | T  | Y   | Y   | V   | V   | Q   | Q   | N | N | N | N | N | N | N | N | N | N | N | N | N | N | N | N | N | N | N | N | N | N | N | N | N | N | N | N | N | N | N | N | N | N |   |   |
| C7_3  | D | H  | T  | Y   | Y   | V   | V   | Q   | Q   | I | N | N | N | N | N | N | N | N | N | N | N | N | N | N | N | N | N | N | N | N | N | N | N | N | N | N | N | N | N | N | N | N | N |   |   |
| C7_5  | D | Q  | W  | W   | W   | V   | V   | Q   | Q   | I | N | N | N | N | N | N | N | N | N | N | N | N | N | N | N | N | N | N | N | N | N | N | N | N | N | N | N | N | N | N | N | N | N |   |   |
| C7_6  | D | W  | Y  | D   | D   | L   | L   | T   | Q   | N | N | N | N | N | N | N | N | N | N | N | N | N | N | N | N | N | N | N | N | N | N | N | N | N | N | N | N | N | N | N | N | N | N |   |   |
| C7_7  | D | W  | T  | N   | N   | S   | S   | R   | S   | N | N | N | N | N | N | N | N | N | N | N | N | N | N | N | N | N | N | N | N | N | N | N | N | N | N | N | N | N | N | N | N | N | N |   |   |
| C7_9  | D | T  | W  | W   | W   | A   | A   | T   | S   | N | N | N | N | N | N | N | N | N | N | N | N | N | N | N | N | N | N | N | N | N | N | N | N | N | N | N | N | N | N | N | N | N | N |   |   |
| C7_14 | D | W  | Y  | E   | E   | L   | L   | N   | T   | N | N | N | N | N | N | N | N | N | N | N | N | N | N | N | N | N | N | N | N | N | N | N | N | N | N | N | N | N | N | N | N | N | N |   |   |
| C7_15 | N | Q  | E  | E   | L   | L   | D   | Y   | N   | N | N | N | N | N | N | N | N | N | N | N | N | N | N | N | N | N | N | N | N | N | N | N | N | N | N | N | N | N | N | N | N | N | N |   |   |
| C7_16 | D | S  | Y  | S   | S   | S   | W   | A   | N   | N | N | N | N | N | N | N | N | N | N | N | N | N | N | N | N | N | N | N | N | N | N | N | N | N | N | N | N | N | N | N | N | N | N | N |   |
| C7_17 | D | K  | A  | S   | S   | V   | W   | H   | N   | N | N | N | N | N | N | N | N | N | N | N | N | N | N | N | N | N | N | N | N | N | N | N | N | N | N | N | N | N | N | N | N | N | N | N |   |
| C7_19 | S | T  | W  | I   | I   | T   | Y   | T   | N   | N | N | N | N | N | N | N | N | N | N | N | N | N | N | N | N | N | N | N | N | N | N | N | N | N | N | N | N | N | N | N | N | N | N | N |   |
| C7_20 | D | W  | Y  | E   | E   | L   | L   | D   | Y   | N | N | N | N | N | N | N | N | N | N | N | N | N | N | N | N | N | N | N | N | N | N | N | N | N | N | N | N | N | N | N | N | N | N | N |   |
| C7_21 | D | R  | S  | Y   | Y   | A   | A   | T   | R   | N | N | N | N | N | N | N | N | N | N | N | N | N | N | N | N | N | N | N | N | N | N | N | N | N | N | N | N | N | N | N | N | N | N | N | N |
| C7_22 | D | T  | Y  | Y   | Y   | L   | L   | H   | R   | N | N | N | N | N | N | N | N | N | N | N | N | N | N | N | N | N | N | N | N | N | N | N | N | N | N | N | N | N | N | N | N | N | N | N | N |
| C7_23 | N | Q  | E  | A   | A   | L   | L   | Y   | Q   | N | N | N | N | N | N | N | N | N | N | N | N | N | N | N | N | N | N | N | N | N | N | N | N | N | N | N | N | N | N | N | N | N | N | N |   |
| C7_24 | D | W  | Y  | S   | S   | S   | A   | K   | N   | N | N | N | N | N | N | N | N | N | N | N | N | N | N | N | N | N | N | N | N | N | N | N | N | N | N | N | N | N | N | N | N | N | N | N | N |
| C7_25 | D | W  | Y  | T   | T   | L   | L   | N   | N   | N | N | N | N | N | N | N | N | N | N | N | N | N | N | N | N | N | N | N | N | N | N | N | N | N | N | N | N | N | N | N | N | N | N | N | N |
| C7_26 | D | W  | T  | S   | S   | V   | T   | Q   | N   | N | N | N | N | N | N | N | N | N | N | N | N | N | N | N | N | N | N | N | N | N | N | N | N | N | N | N | N | N | N | N | N | N | N | N | N |
| C7_27 | D | W  | Y  | N   | N   | A   | A   | A   | Y   | N | N | N | N | N | N | N | N | N | N | N | N | N | N | N | N | N | N | N | N | N | N | N | N | N | N | N | N | N | N | N | N | N | N | N | N |
| C7_28 | D | W  | Y  | S   | S   | S   | A   | K   | N   | N | N | N | N | N | N | N | N | N | N | N | N | N | N | N | N | N | N | N | N | N | N | N | N | N | N | N | N | N | N | N | N | N | N | N | N |
| C7_29 | D | N  | W  | A   | A   | L   | L   | N   | Y   | N | N | N | N | N | N | N | N | N | N | N | N | N | N | N | N | N | N | N | N | N | N | N | N | N | N | N | N | N | N | N | N | N | N | N | N |
| C7_30 | D | Q  | W  | W   | S   | S   | H   | E   | N   | N | N | N | N | N | N | N | N | N | N | N | N | N | N | N | N | N | N | N | N | N | N | N | N | N | N | N | N | N | N | N | N | N | N | N | N |

|       |                                 |         |       |     |
|-------|---------------------------------|---------|-------|-----|
|       | 160                             | 170     | 180   |     |
| N3C   | DLAIDNGNEDIAEVLQKAAKLGSGSMEQKLI | SEEDLNE |       | 188 |
| C7_1  | .....                           | .....   | ..... | 188 |
| C7_3  | .....                           | .....   | ..... | 188 |
| C7_5  | .....                           | .....   | ..... | 188 |
| C7_6  | .....                           | .....   | ..... | 188 |
| C7_7  | .....                           | .....   | ..... | 188 |
| C7_9  | .....                           | .....   | ..... | 188 |
| C7_14 | .....                           | .....   | ..... | 188 |
| C7_15 | .....                           | .....   | ..... | 188 |
| C7_16 | .....                           | .....   | ..... | 188 |
| C7_17 | .....                           | .....   | ..... | 188 |
| C7_19 | .....S.....                     | .....   | ..... | 188 |
| C7_20 | .....                           | .....   | ..... | 188 |
| C7_21 | .....I.....                     | .....   | ..... | 188 |
| C7_22 | .....                           | .....   | ..... | 188 |
| C7_23 | .....                           | .....   | ..... | 188 |
| C7_24 | .....N.....                     | .....   | ..... | 188 |
| C7_25 | .....G.....                     | .....   | ..... | 188 |
| C7_26 | .....V.....                     | .....   | ..... | 188 |
| C7_27 | .....                           | .....   | ..... | 188 |
| C7_28 | .....                           | .....   | ..... | 188 |
| C7_29 | .....                           | .....   | ..... | 188 |
| C7_30 | .....V.....                     | .....   | ..... | 188 |

  
*C-Cap*

**Supporting Information Figure S6:** Sequence alignment of caspase-7 specific DARPins.



|         | 150                                       | 160 | 170 | 180 |     |
|---------|-------------------------------------------|-----|-----|-----|-----|
| N3C     | TPFDLAIDNGNEDIAEVLQKAAKLGSGSMEQKLISEEDLNE |     |     |     | 188 |
| AcrB_1  | .....                                     |     |     |     | 188 |
| AcrB_3  | .....                                     |     |     |     | 188 |
| AcrB_4  | .....                                     |     |     |     | 188 |
| AcrB_5  | .....                                     |     |     |     | 188 |
| AcrB_6  | .....                                     |     |     |     | 188 |
| AcrB_7  | .....                                     |     |     |     | 188 |
| AcrB_9  | .....                                     |     |     |     | 188 |
| AcrB_10 | .....E.....                               |     |     |     | 188 |
| AcrB_11 | .....                                     |     |     |     | 188 |
| AcrB_12 | .....                                     |     |     |     | 188 |
| AcrB_13 | .....                                     |     |     |     | 188 |
| AcrB_15 | .....                                     |     |     |     | 188 |
| AcrB_16 | .....                                     |     |     |     | 188 |
| AcrB_17 | .....                                     |     |     |     | 188 |
| AcrB_18 | .....                                     |     |     |     | 188 |
| AcrB_20 | .....                                     |     |     |     | 187 |
| AcrB_21 | .....                                     |     |     |     | 188 |
| AcrB_22 | .....                                     |     |     |     | 189 |
| AcrB_23 | .....N.....                               |     |     |     | 188 |
| AcrB_25 | ...E.....                                 |     |     |     | 188 |
| AcrB_26 | .....                                     |     |     |     | 189 |
| AcrB_27 | .....E.....                               |     |     |     | 188 |
| AcrB_28 | .....                                     |     |     |     | 188 |
| AcrB_29 | .....                                     |     |     |     | 188 |
| AcrB_30 | .....                                     |     |     |     | 188 |


  
*C-Cap*

**Supporting Information Figure S7:** Sequence alignment of AcrB specific DARPins.

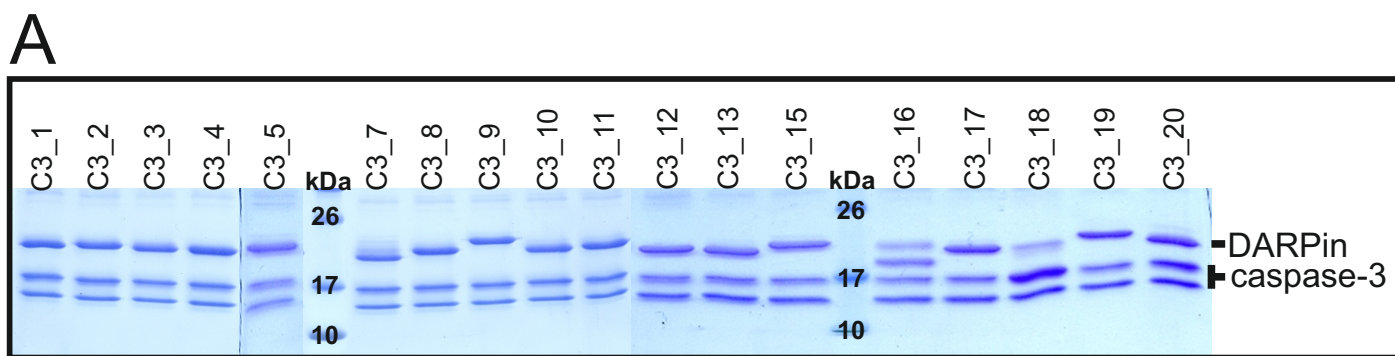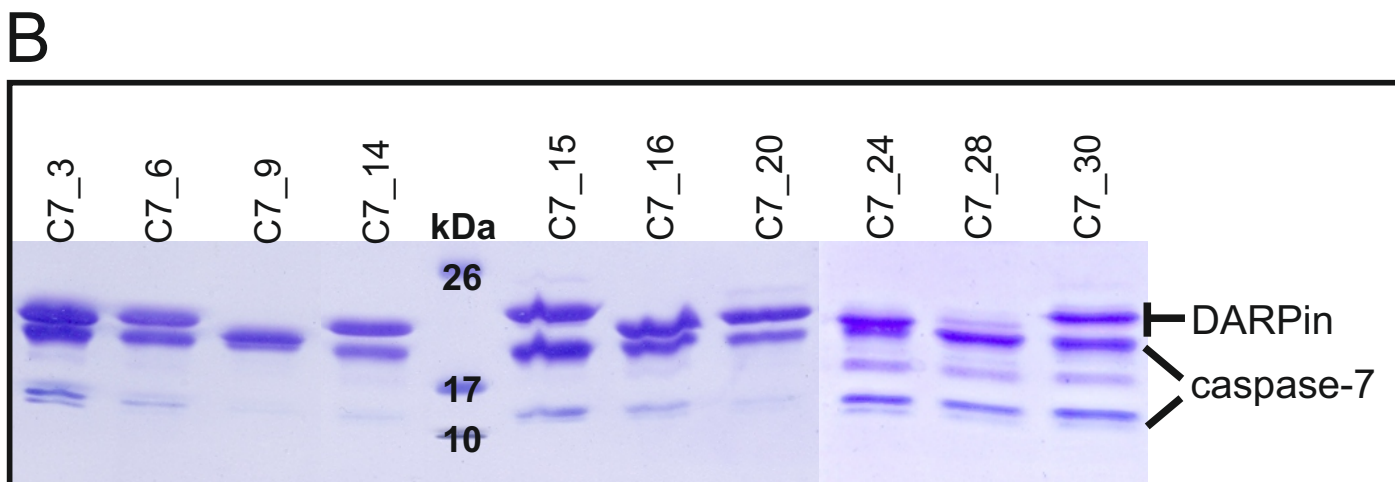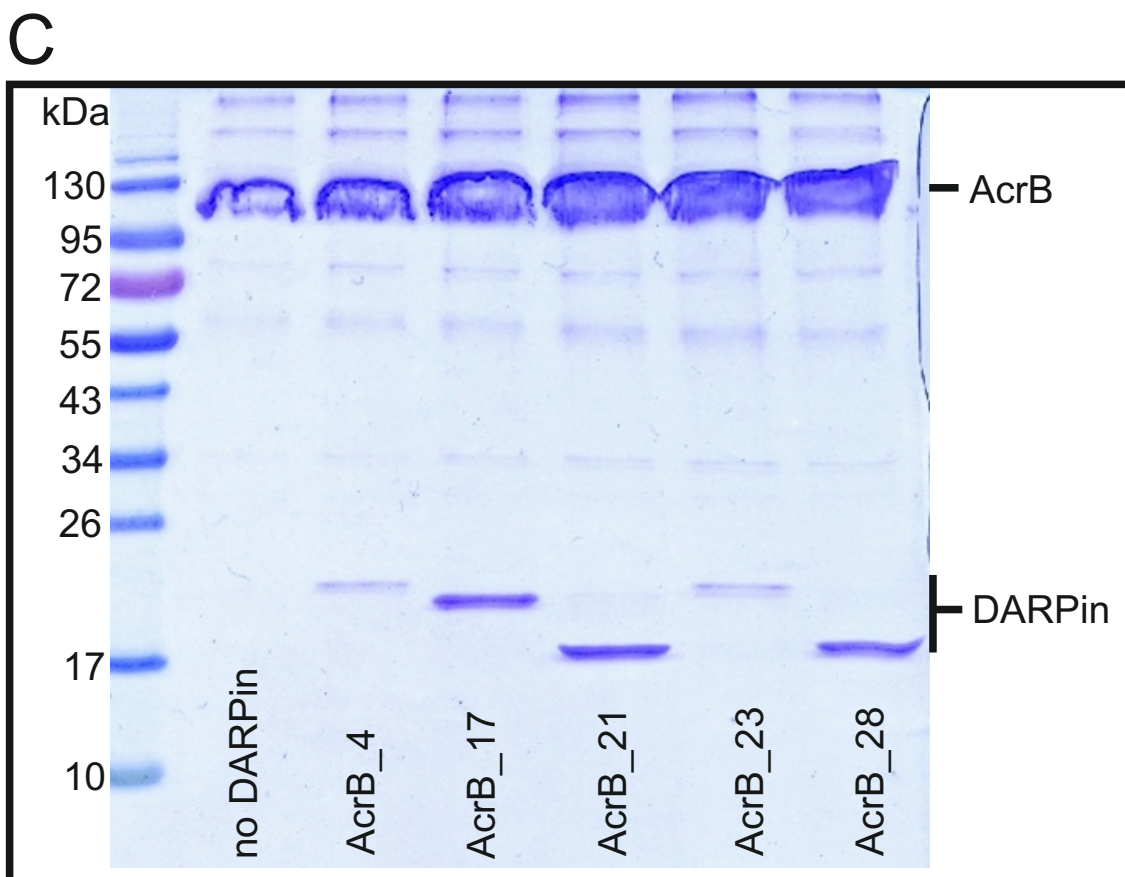

**Supporting Information Figure S8:** DARPins specific for caspase-3 (A), caspase-7 (B) and AcrB (C) were co-purified by SEC with their targets (example in Figure 6B) and the complex peak fractions were analyzed by SDS-PAGE. The double band for C3\_16 in (A) can be explained by incomplete denaturation of this DARPin during SDS-PAGE. AcrB\_4 and AcrB\_23 in (C) appear to partially dissociate from AcrB during SEC analysis, owing to their modest affinity (Figure 6F).

**D1**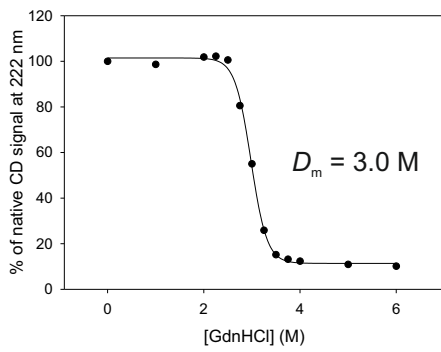**D3**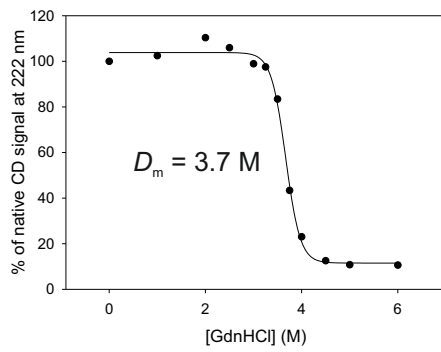**D7**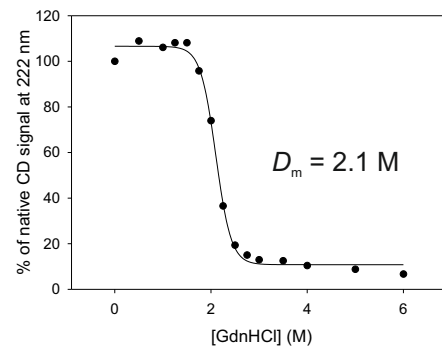**D9**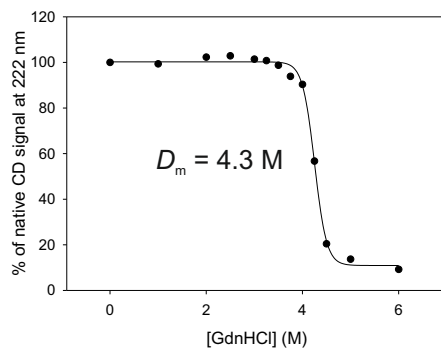**D10**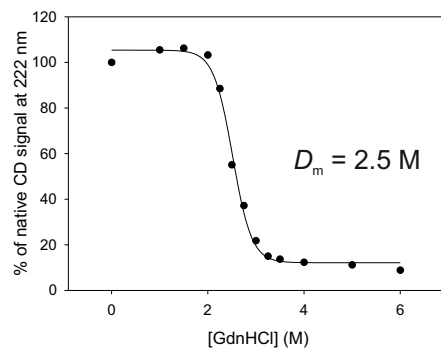**D11**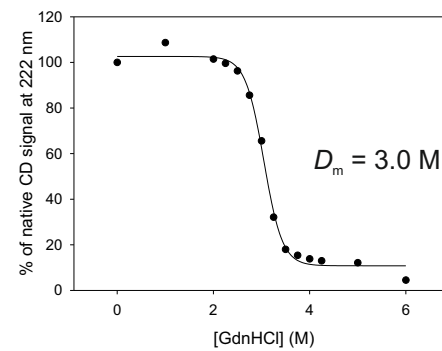**D12**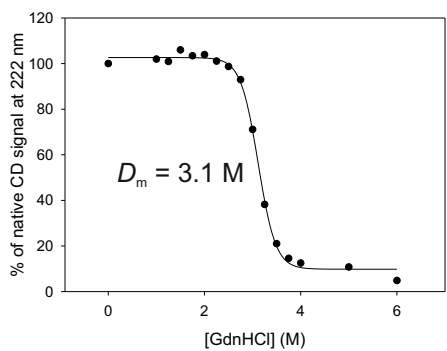**D16**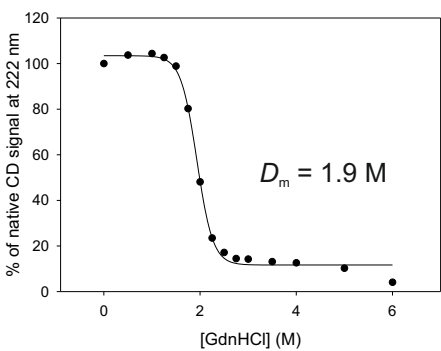**D17**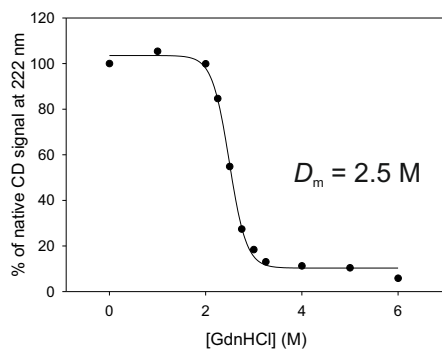**D20**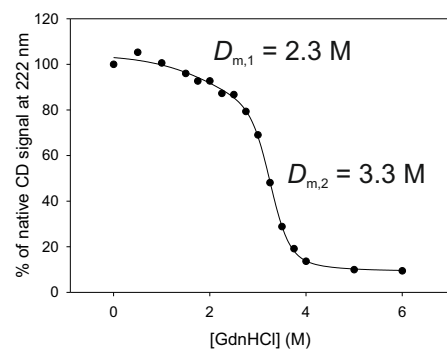**D21**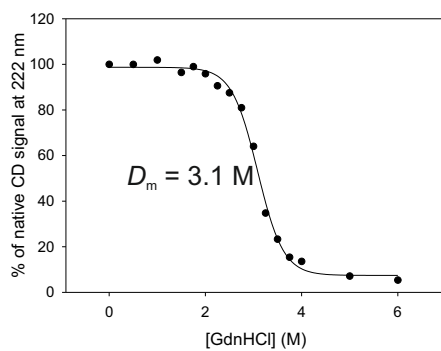**D23**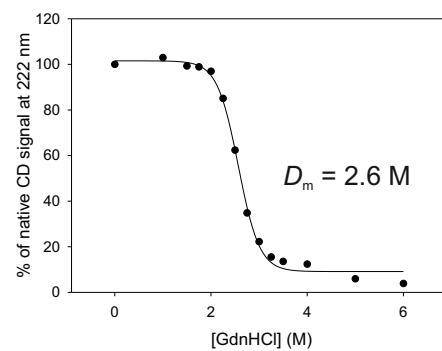



### D24

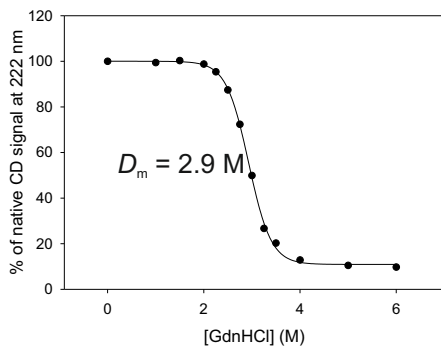

### D25

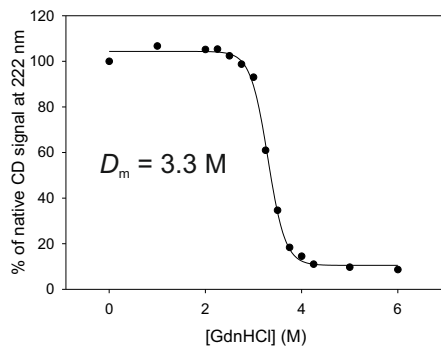

### D26

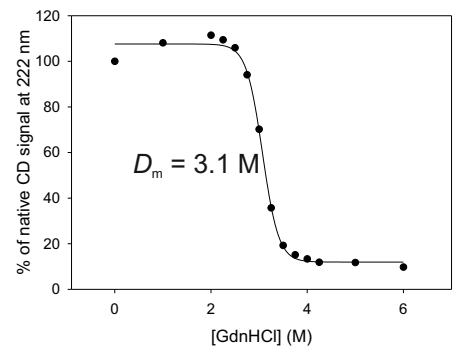

### C3\_11

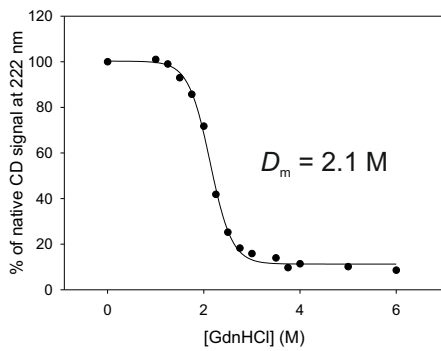

### C3\_13

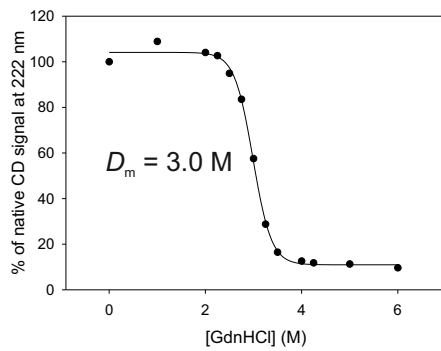

### C3\_15

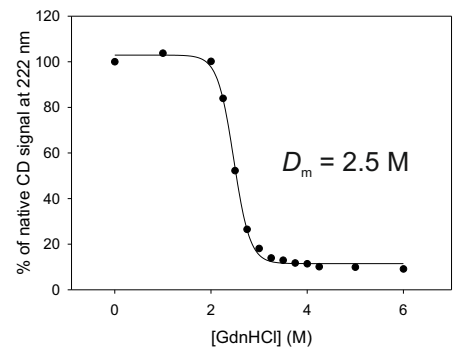

### C3\_19

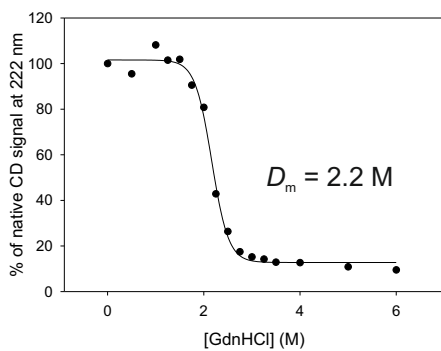

### C3\_20

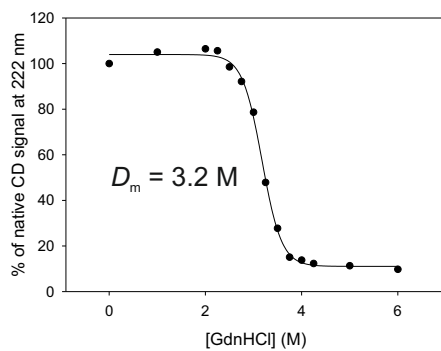

### C7\_14

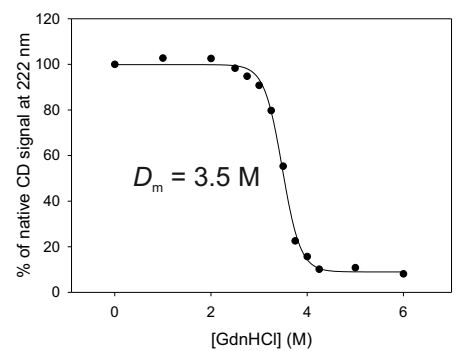

### C7\_16

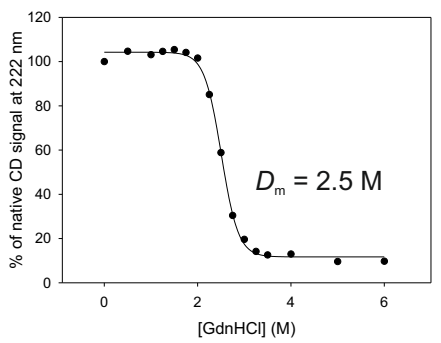

### C7\_20

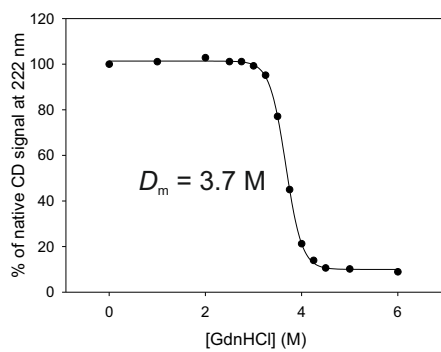

### C7\_24

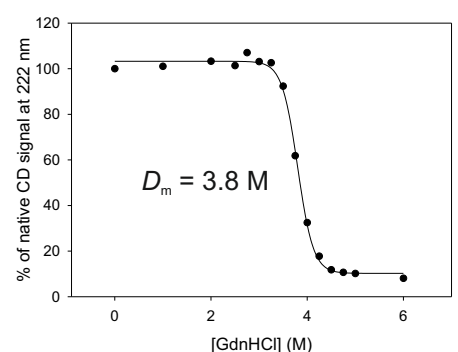

### C7\_28

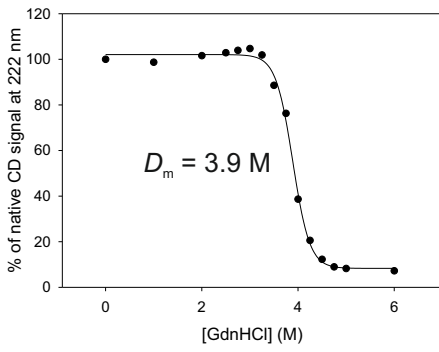

### off7 (1SVX)

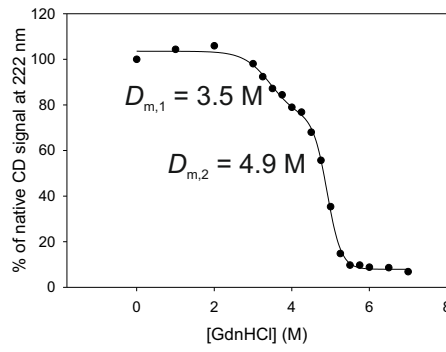

### 1108\_19 (2J8S)

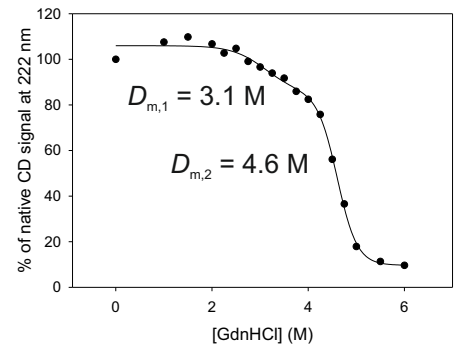

### DARPin#2 (3NOC)

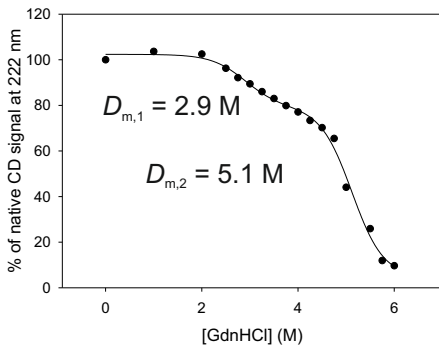

### DARPin#3 (3NOG)

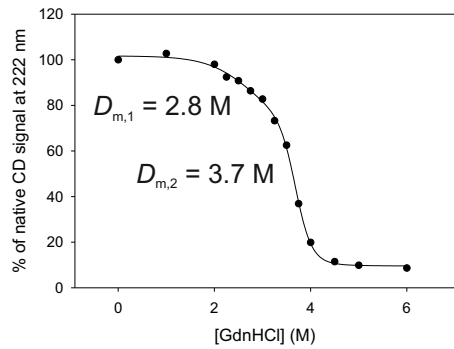

### $\alpha$ -LmrCD#3

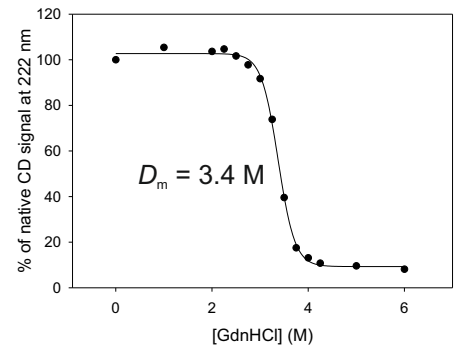

### $\alpha$ -LmrCD#4

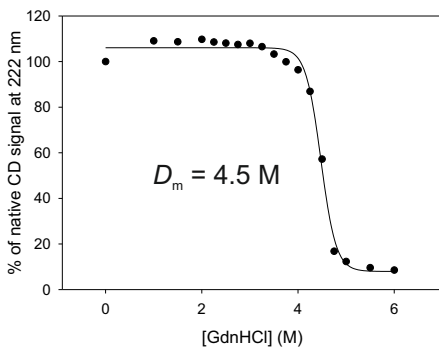

### DARPin\_55

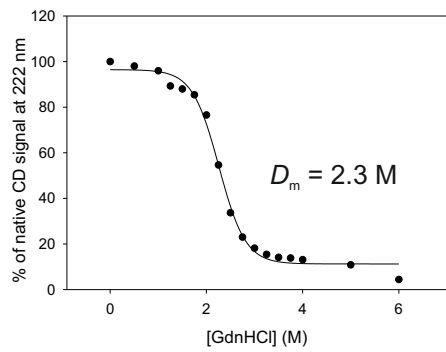

### D3.4 (2XZD)

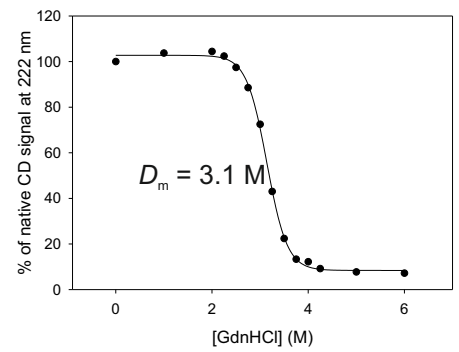

### D7.18

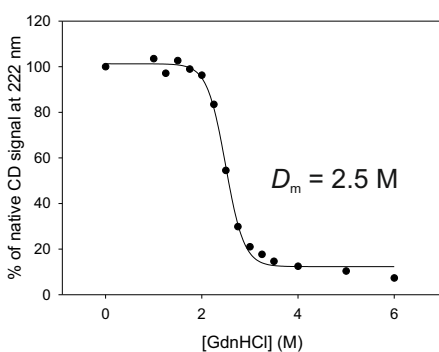

### D8.14 (2Y1L)

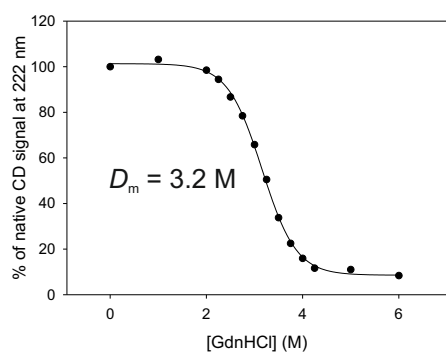

**Supporting Information Figure S9:** Equilibrium unfolding curves of original and new DARPins. 25 new DARPins (15 unselected DARPins (denoted by a “D” before the number), 5 DARPins each specific for caspase-3 and caspase-7 (denoted by “C3\_” and “C7\_” before the number)) and original DARPins off7 (PDB 1SVX, against MBP)<sup>12</sup>, 11\_0819 (PDBs 2J8S and 4DX5, against AcrB)<sup>28,36</sup>, DARPIn#2 and #3 (PDBs 3NOC and 3NOG, against AcrB)<sup>42</sup>,  $\alpha$ -LmrCD#3 and #4 (against LmrCD)<sup>30</sup>, DARPIn#55 (against MsbA)<sup>29</sup>, D3.4 (PDB 2XZD, against caspase-3)<sup>40</sup>, D7.18 (against caspase-7, to be published) and D8.14 (PDB 2Y1L, to be published) were analyzed by GdnHCl unfolding. Monophasic or biphasic sigmoidal equations were fitted to the experimental data (Equations 1 and 2, see Materials and Methods) to determine midpoints of denaturation ( $D_m$  for monophasic and  $D_{m,1}$  and  $D_{m,2}$  for biphasic unfolding curves).

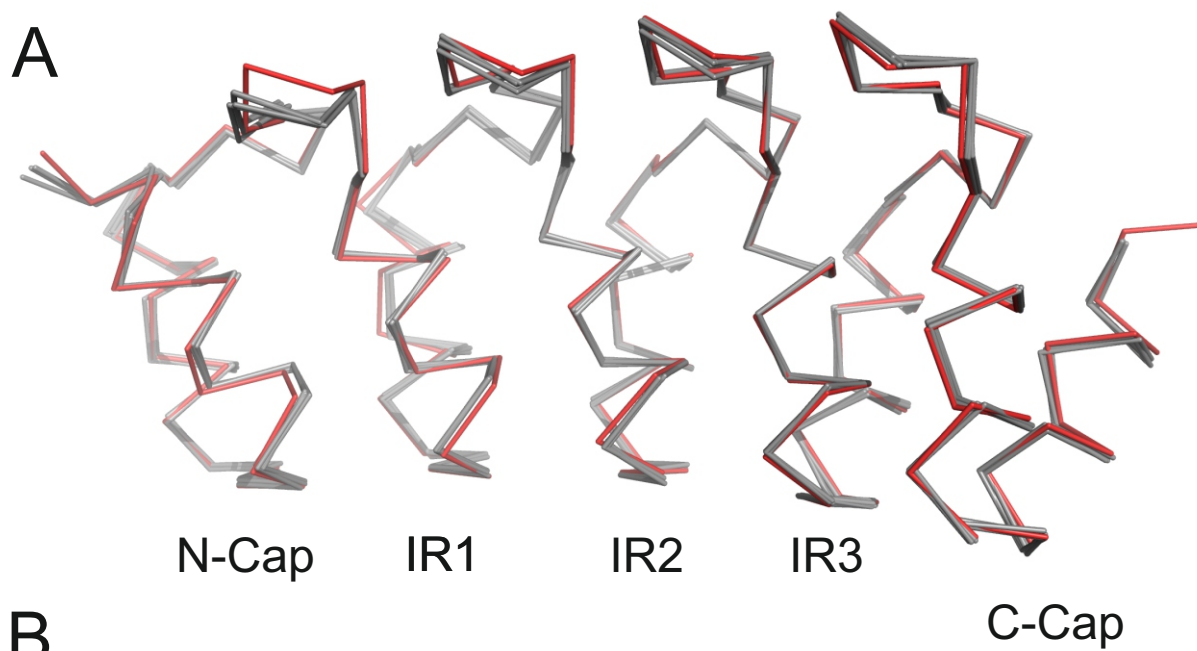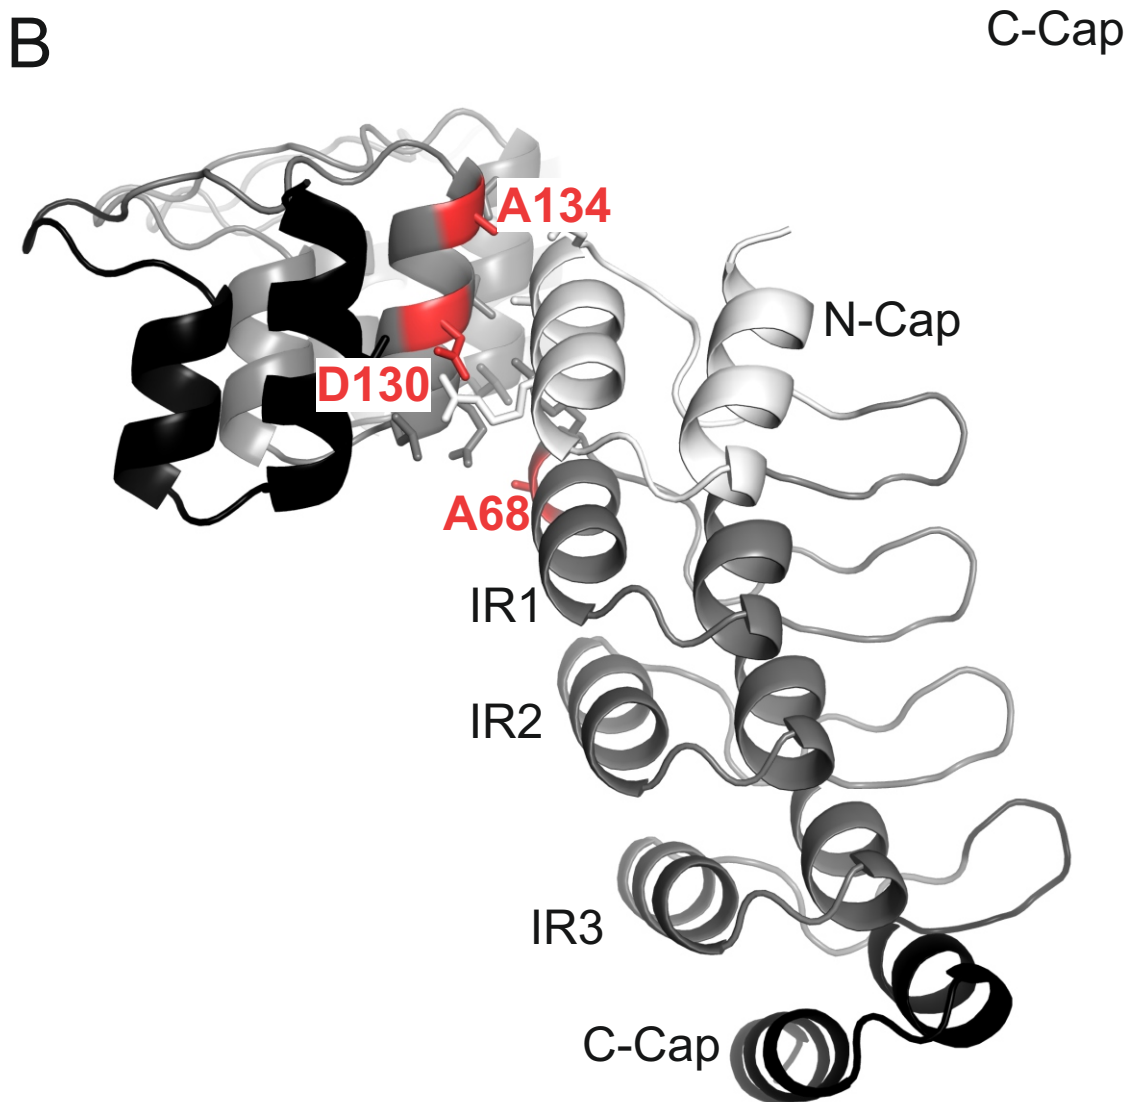

**Supporting Information Figure S10:** (A) DARPin C7\_16 (red) is superimposed with a full-consensus DARPin containing an optimized C-cap (2XEE, Kramer et al. 2010, all four chains of the asymmetric unit are shown in grey). (B) Analysis of DARPin-mediated crystal contact of the C7\_16-caspase-7 complex structure. The crystal contact interface involves low-entropy residues A68, A130 and D134 (highlighted in red), which were lysines and glutamates, respectively, in the original DARPin library.
